# Supplementary material for: A novel TPR–BEN domain interaction mediates PICH–BEND3 association
Source: Oxford University Press journal article supplement (doi:10.1093/nar/gkx792), 2017-08-31
Supplement: gkx792_supp.zip [file gkx792_supp.zip]

Suppl. Fig 1

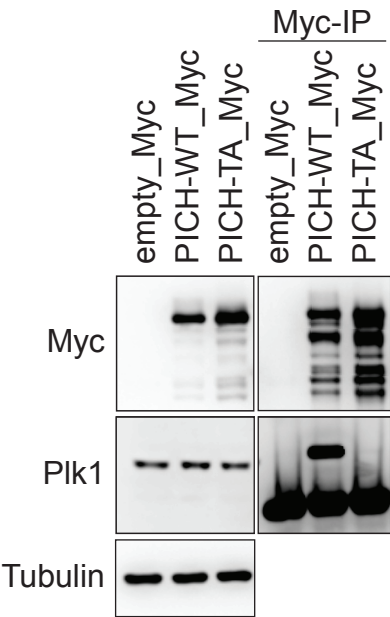

Suppl. Fig 2

**a**

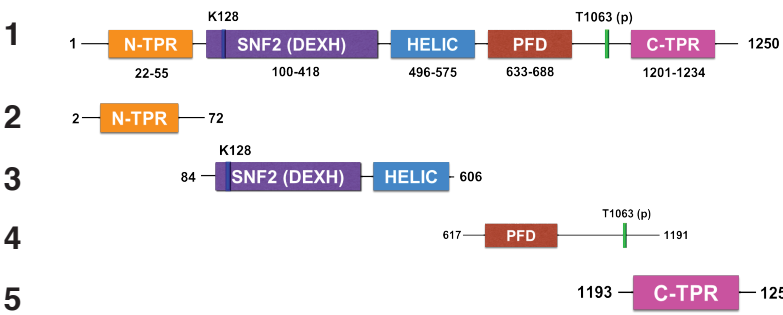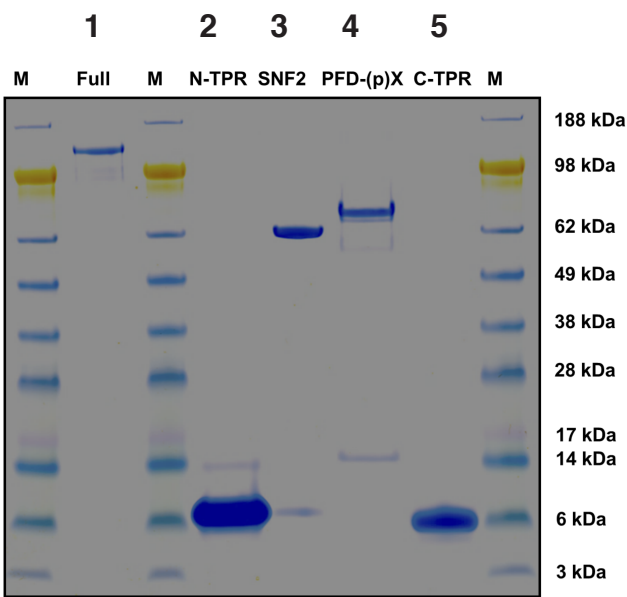

**b**

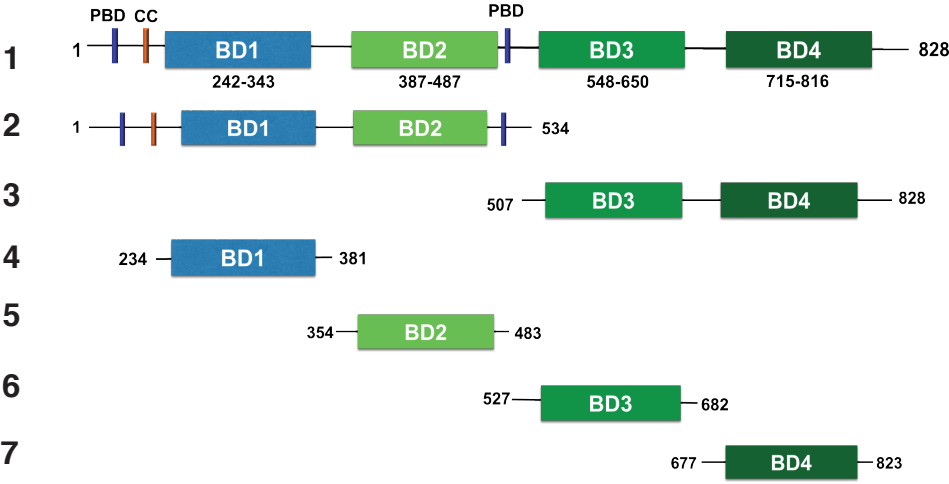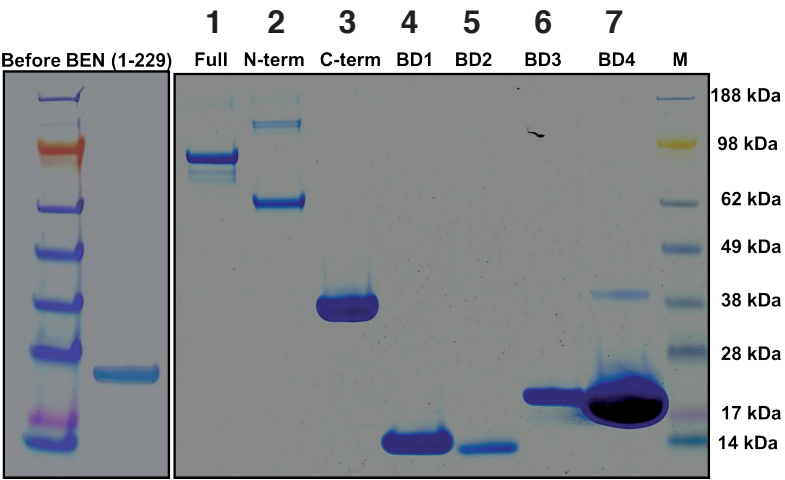

Suppl. Fig 3

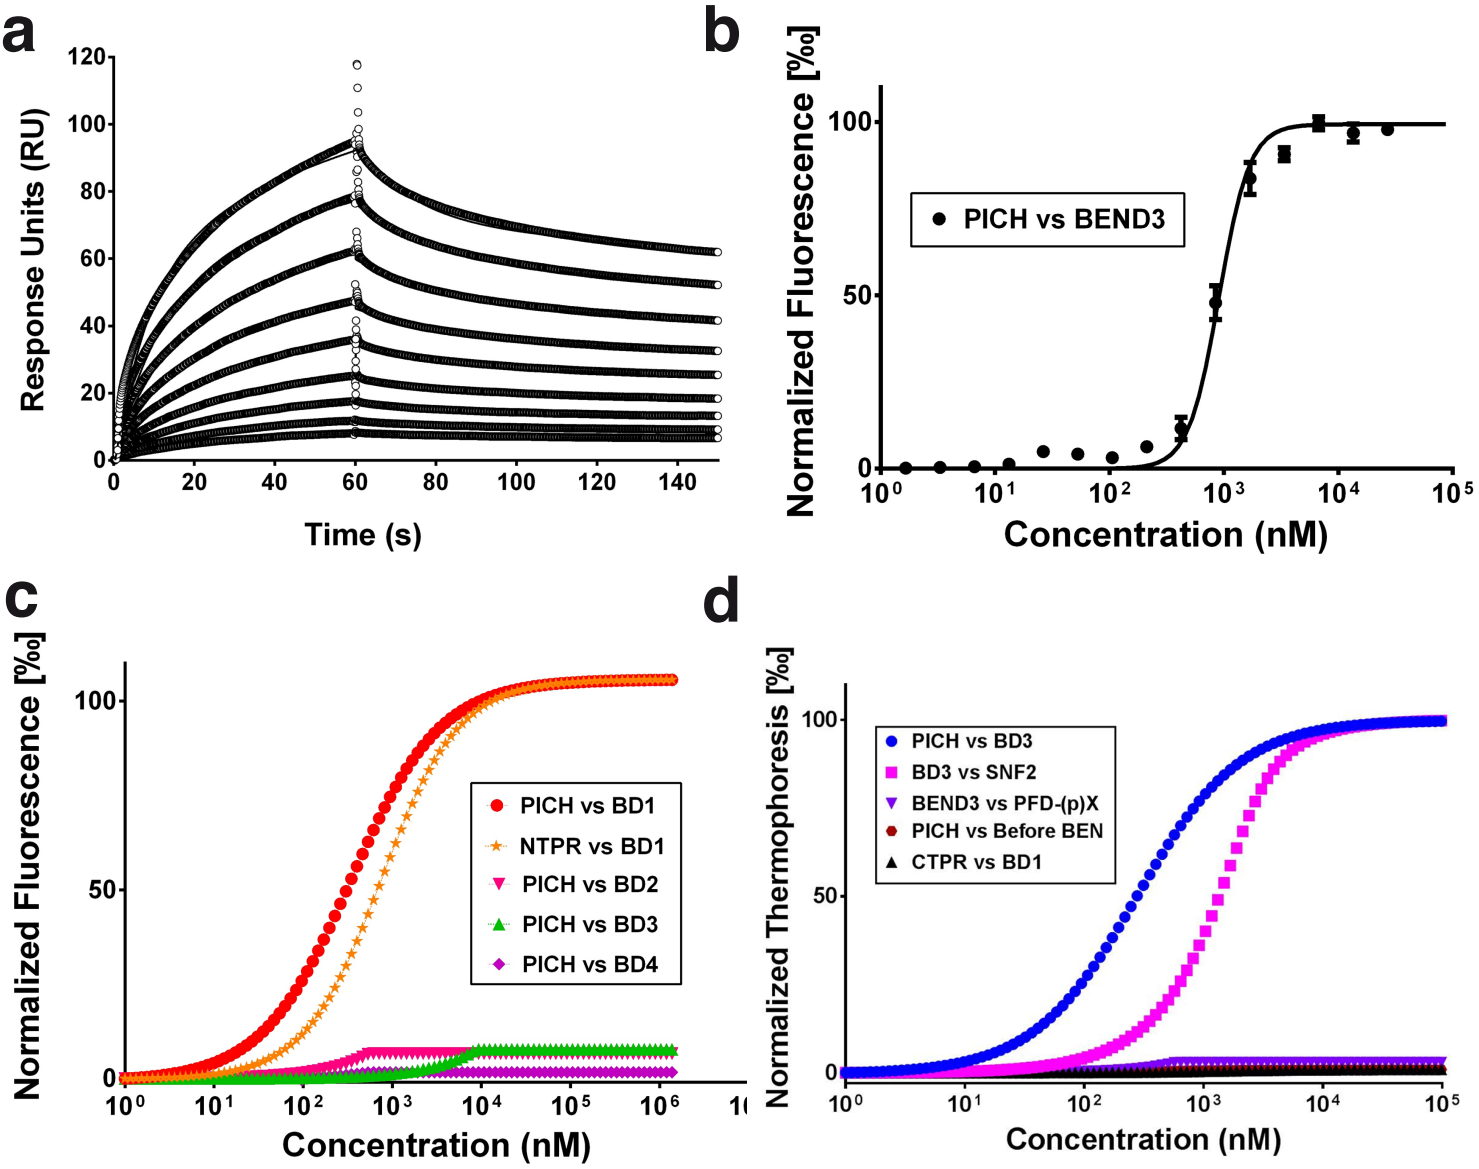

**a**

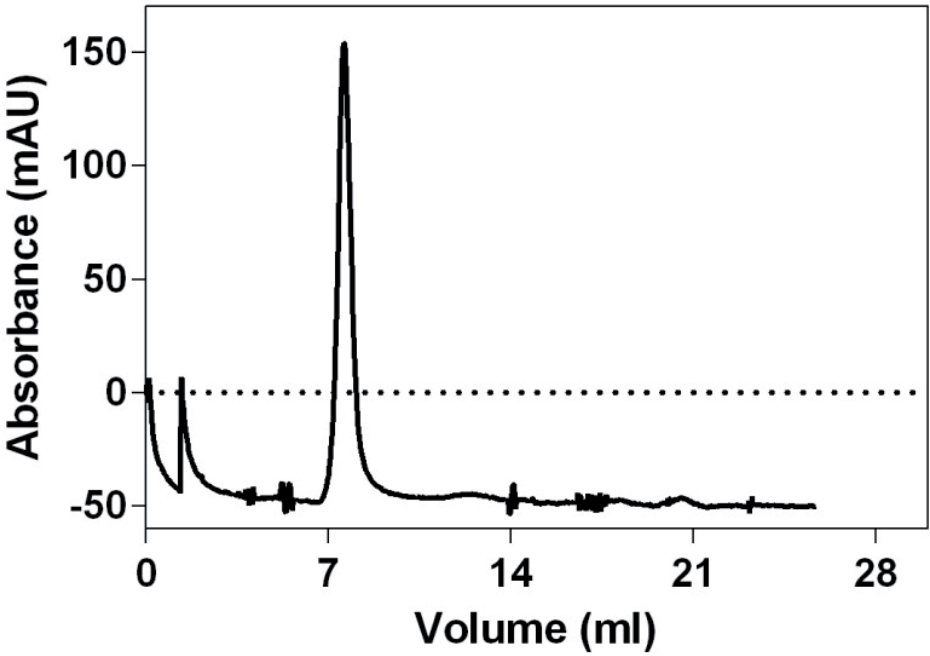

**b**

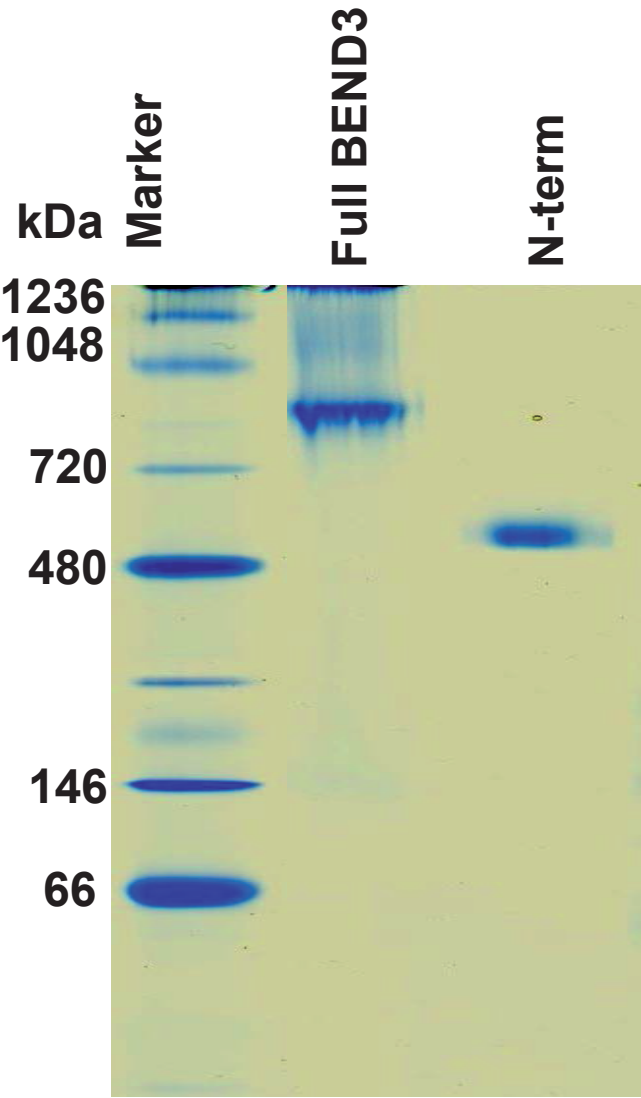



Suppl. Fig 5

a

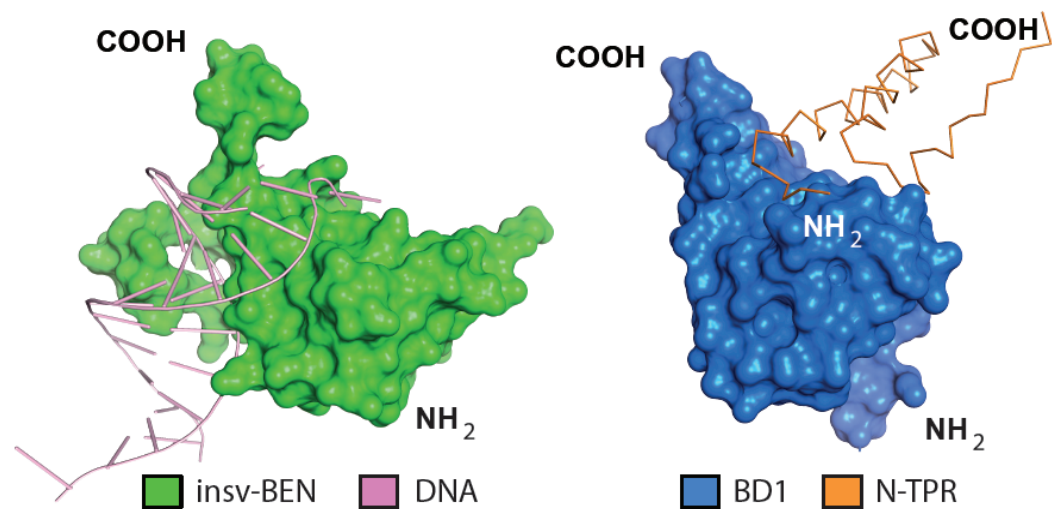

b

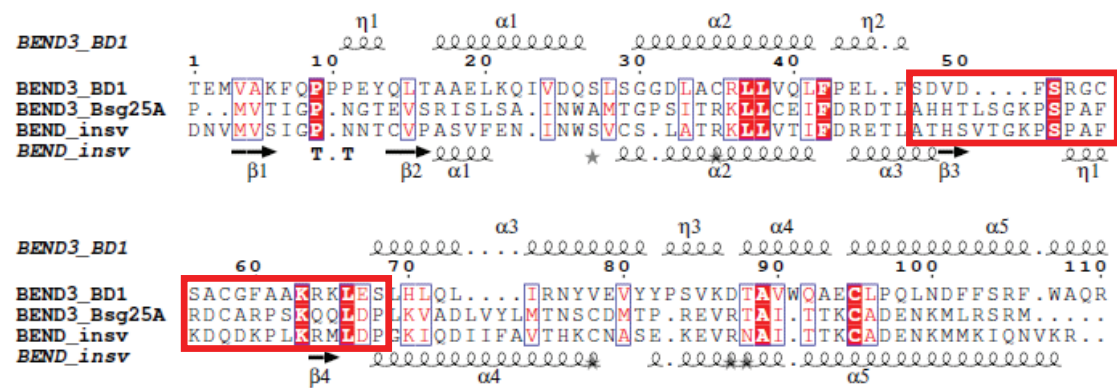

Suppl. Fig 6

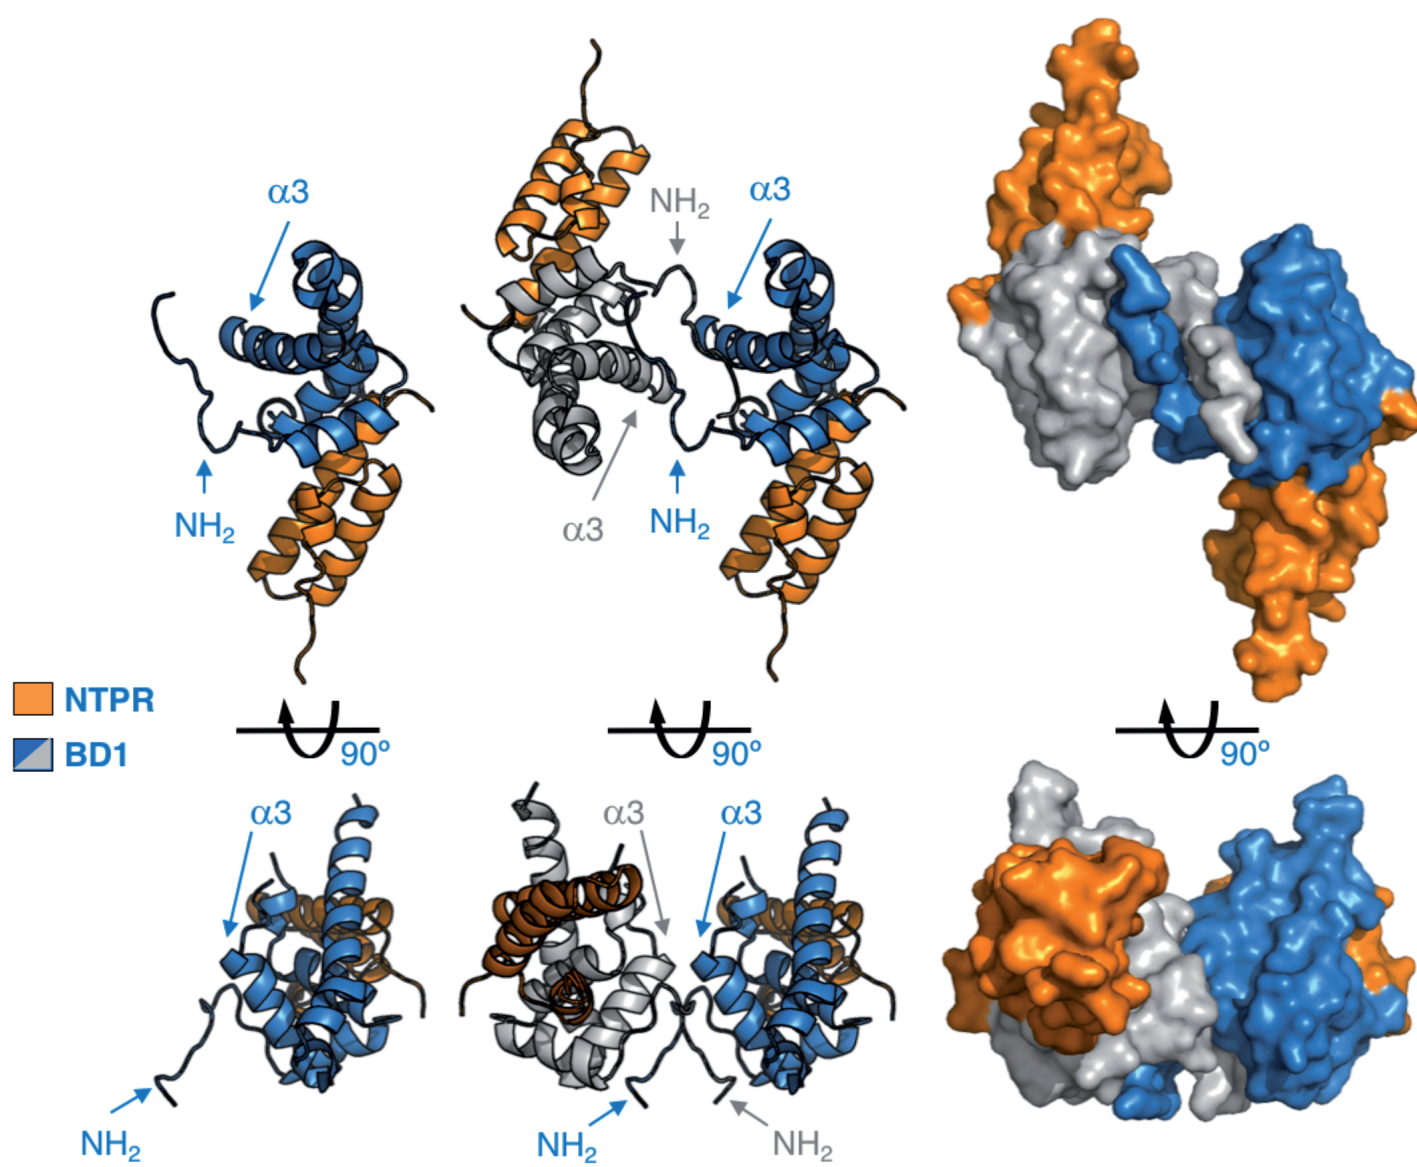

Supp. Fig. 7

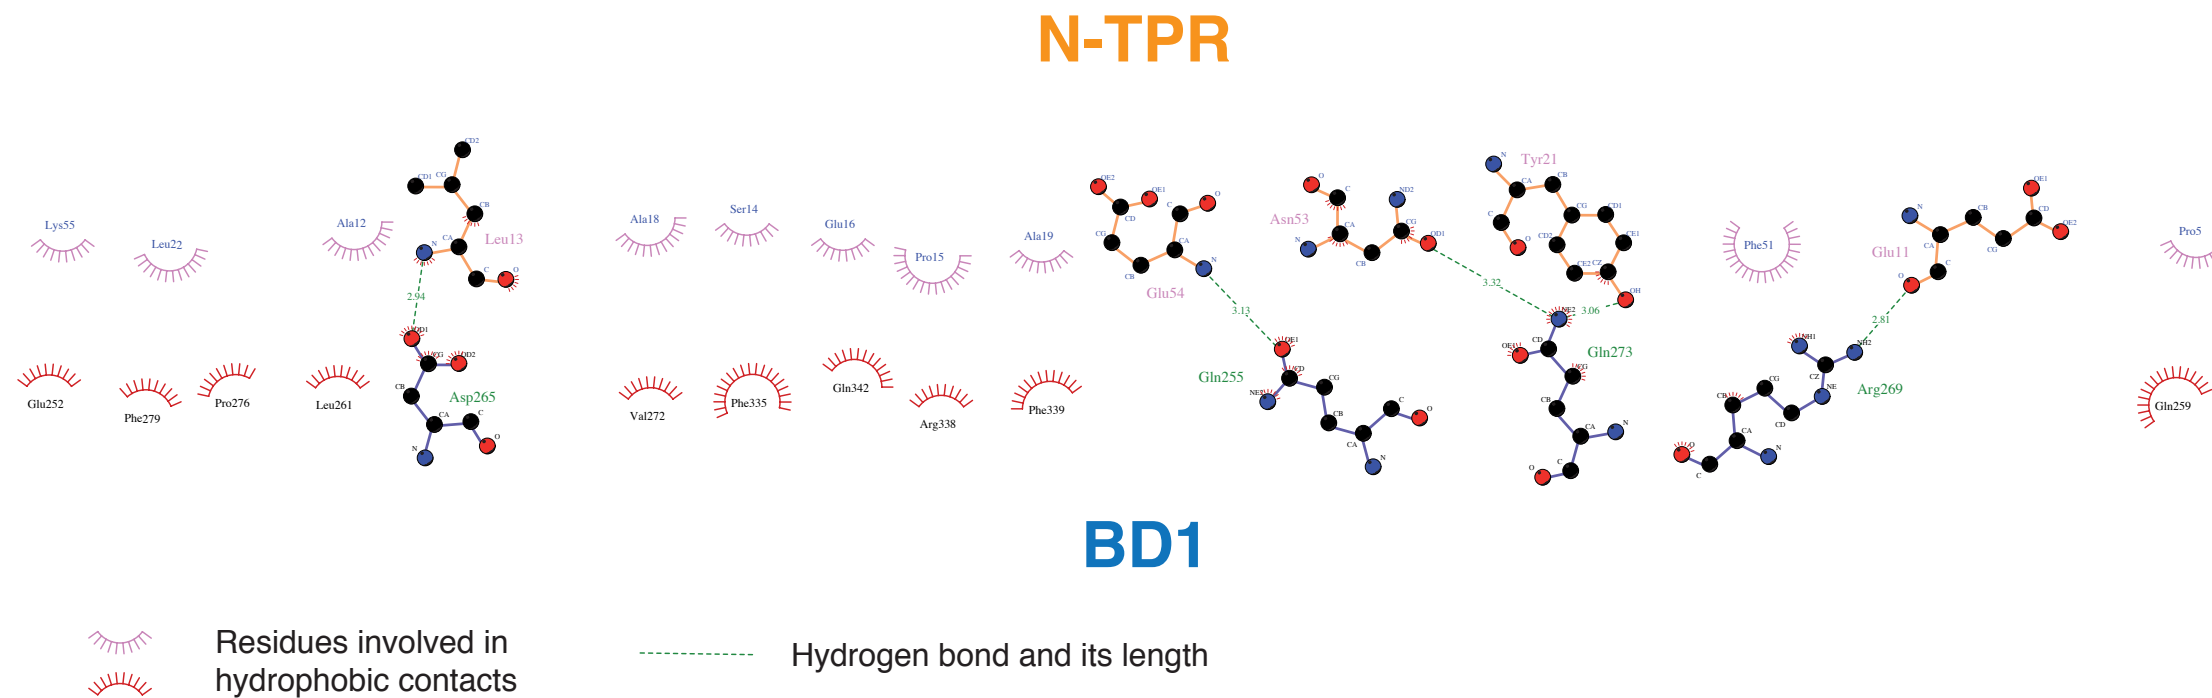

a

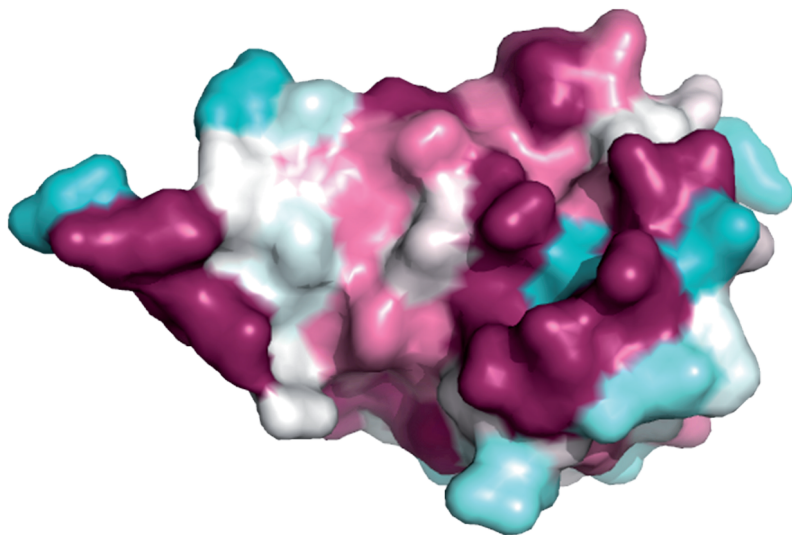

b

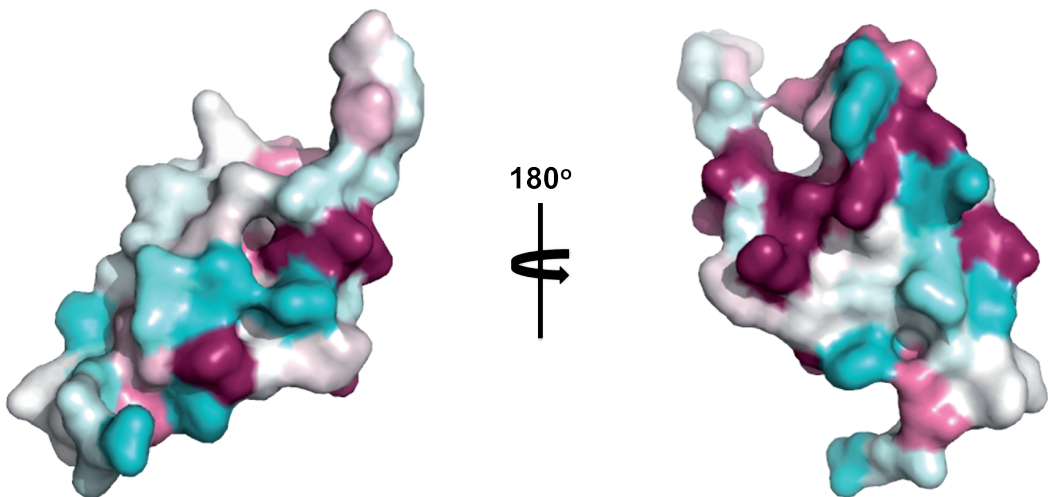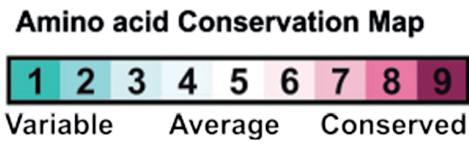

**a**

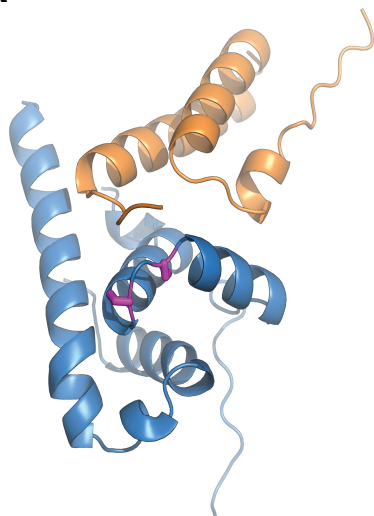

**b**

**BEND3\_BD1**

1 10 20 30 40 50 60 70 80 90 100 110 120 130 140

BEND3\_BD1 T...EM...VAKFQPPPEYQLTAAELKQIVDQSLS  
BEND3\_BD2 VA..SFEEAEQVDPGHFLDNKD....EEALS LDRSSTIA.SDHVVDTQDLTEFLDEAS  
BEND3\_BD3 KIW.....LVPIDFDKLEIQPDPFEVPGADCLLSKEQLRSIYESSL  
BEND3\_BD4 ERFREEFEGPPLPPERS..SKDFCKIPIDELVVPSPDFPVSPYLLSDKVEVREIVQOSSL

**BEND3\_BD1**

α2 η2 α3 η3

30 40 50 60 70 80 90 100 110 120 130 140

BEND3\_BD1 SGGDLACRLLVQLFPPELFSDVDVFSRGCSSACGFAAKKRKLLESRLHLQLIRNRYVEVYYPVSVKDDT  
BEND3\_BD2 SPGEFAVELLRLLHFPELFDHRKLGEOYSYCGDGKKQLLDPSRIKLIRHYVQLLYPRAKND  
BEND3\_BD3 SIGNEFASRLLVHLPPELFTHENLRKYSCSGSLGKKQLLDPSRIKLIRHYVQLLYPRAKND  
BEND3\_BD4 SVGENEAFARLLVRLFPPELFTAENLRLYNHSGACNKQLLDPTRLRLIRHYVEAVYVPEKME

**BEND3\_BD1**

α4 α5

90 100 110 120 130 140

BEND3\_BD1 AVWQAECFLPCINFFSRFWA.QREMEDSQPS...GQVASFFEAEQVDPGHFLDNKDQEE  
BEND3\_BD2 EAWLQCAQRINDLEGLERCRRTDEQRSSYQQQRKVHVPGPECRDLTSYAINPERFRE.....  
BEND3\_BD3 RVWTLFVFGKLDLERCRRTDEQRSSYQQQRKVHVPGPECRDLTSYAINPERFRE.....  
BEND3\_BD4 EVWHYECIPSIDERCRRPNRKCCDILKK

**C**

**Bend3\_human**

η1 α1 α2 η2 η3 α4 α5

240 250 260 270 280 320 330 340 350

Bend3\_human  
Bend3\_chimp  
Bend3\_mouse  
Bend3\_chicken  
Bend3\_xenopus  
Bend3\_zebfish

|         |           |                |             |           |      |          |    |          |           |          |    |    |
|---------|-----------|----------------|-------------|-----------|------|----------|----|----------|-----------|----------|----|----|
| TEMVAK  | FQPPEYOLT | AAELKQIVDQSL   | SGGOLACRLLV | QLFPPELFS | DDVD | YPSVKD   | TA | VWQAECLP | QLNDFFSRF | WAQREME  | DS | QP |
| TEMVAK  | FQPPEYOLT | AAELKQIVDQSL   | SGGOLACRLLV | QLFPPELFS | DDVD | YPSVKD   | TA | VWQAECLP | QLNDFFSRF | WAQREME  | DS | QP |
| SEEVAK  | FQPPEYOLT | ASAEELKQIAEQSL | SGGOLACRLLV | QLFPPELFS | DDVD | YPNVKD   | TA | VWQAECLP | QLNDFFSRF | WAQREME  | DS | QP |
| VEGVADF | KPPPEYILT | SAELKQIMDQST   | SGGOLACRLLV | QLFPPELFS | DDDE | CYPSVKST | AV | WQVECLP  | QLNDFFSRF | WAQREME  | EN | NP |
| QELVAF  | FQPPEYOLT | SETELKQVMDQSS  | CAGOLACRLLV | QLFPPELFS | SDSG | CYPSVKNT | GT | IVQVECLP | QLNDFFSRF | WAQREME  | SV | TR |
| SEVMVE  | FQPPEYOLT | SEELAQIMBQIT   | TAGELGCRLLV | QLFPPELFT | TKKE | CYPLVKNN | EN | VWQTECLL | QLNDFFSRF | WAQKDEME | SG | QV |
